# Supplementary material for: Efficient charge storage in photoexcited TiO2 nanorod-noble metal nanoparticle composite systems
Source: Royal Society of Chemistry journal article supplement (doi:10.1039/b503774c), 2005-01-01
Supplement: b503774c.pdf [file b503774c.pdf]

## Electronic Supplementary Information

# Efficient charge storage in photoexcited TiO<sub>2</sub> nanorod-noble metal nanoparticle composite systems

P. D. Cozzoli, M. L. Curri, and A. Agostiano

### 1. Synthesis of TiO<sub>2</sub> nanorod-stabilized metal nanoparticles

**Materials.** All chemicals were of the highest purity available and were used as received without further purification. Chloroauric acid trihydrate (HAuCl<sub>4</sub>·3H<sub>2</sub>O, 99.998%), silver nitrate (AgNO<sub>3</sub>, 99.99%) titanium tetraisopropoxide (Ti(OPr<sup>i</sup>)<sub>4</sub> or TTIP, 99.999%), trimethylamino-N-oxide dihydrate ((CH<sub>3</sub>)<sub>3</sub>NO·2H<sub>2</sub>O or TMAO, 98%), oleic acid (C<sub>18</sub>H<sub>33</sub>CO<sub>2</sub>H or OLEA, 90%), Uniblue A (UBA, sodium salt, M.W. 506.49; the molecular structure is reported in **Fig. 1S**) were purchased from Aldrich. All solvents used were of analytical grade and purchased from Aldrich.

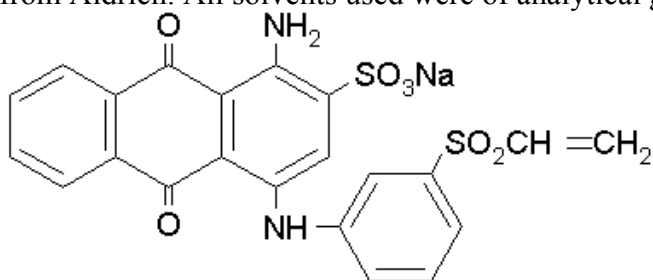

**Figure 1S** Molecular structure of Uniblue A

**Synthesis of TiO<sub>2</sub> nanorods (NRs).** Organic-capped anatase TiO<sub>2</sub> nanorods were synthesized by hydrolysis of TTIP using OLEA as the surfactant at low temperatures (80-100 °C), as reported in ref. 16 of the manuscript. Briefly, TTIP was hydrolyzed by reacting with an excess of aqueous TMAO solution (H<sub>2</sub>O:TTIP molar ratio ranged from 40:1 to 150:1). Rod-like titania nanocrystals resulted from the direct injection of large aqueous base volumes into OLEA:TTIP mixtures. The as-prepared OLEA-coated TiO<sub>2</sub> NRs were easily re-dispersed in chloroform, without any further

growth or irreversible aggregation. In the photocatalytic experiments in this work, the native OLEA capping on the surface of the oxide nanocrystals was first removed by extensive washing, and then replaced by a fresh one, as described in ref. 16 of the manuscript.

**Photocatalytic synthesis of TiO<sub>2</sub>/metal nanocomposites.** A quartz cuvette was filled with a solution containing the desired concentration of TiO<sub>2</sub> nanocrystals (expressed with reference to the parent species, TTIP) and either HAuCl<sub>4</sub> or AgNO<sub>3</sub> in a CHCl<sub>3</sub>:EtOH=90:10 v/v mixture. The metal precursor concentration ranged between 10<sup>-5</sup> M and 10<sup>-4</sup> M, while TiO<sub>2</sub> concentration was between 10<sup>-3</sup> M and 10<sup>-1</sup> M. To obtain stable nanocomposites (i.e. to prevent the precipitation of the metallic particles), the TiO<sub>2</sub>:metal precursor molar ratio should be kept in the range 100:1 to 20:1. The cuvette was sealed by a Teflon-faced rubber cap and the solution was subsequently deaerated by gently purging with nitrogen for 30 min. The mixture was UV-irradiated under stirring by using a High Pressure 200 W mercury lamp ( $\lambda > 300$  nm). The lamp output was reduced to 10% of the original power by placing neutral density filters on the light path. This condition also ensured a minimal photo-oxidation of the TiO<sub>2</sub> organic capping, thereby prolonging the colloidal stability of the TiO<sub>2</sub> nanorods under illumination. Aliquots were withdrawn at scheduled time intervals via a syringe for TEM observations. Metal particle sizes in the 5-25 nm range with size variance of 10-20% were typically employed. Detailed structural and morphological characterization of the TiO<sub>2</sub> NR-metal NP composites has been reported previously in ref. 17-18.

In the case of silver, the mean Ag particle size and size distribution was modulated by varying the absolute AgNO<sub>3</sub> concentration and the irradiation time, as such metallic nanoparticles are susceptible to size modification based on light-induced fragmentation and/or ripening processes (see details in ref. 17 of the manuscript).

In the case of gold, the mean Au particle size and size distribution was modulated by varying the absolute HAuCl<sub>4</sub> concentration and the irradiation time. Irradiation was stopped at the desired particle growth stage before the metal NPs started to aggregate in chainlike assemblies (see ref. 18 in the manuscript).

As an example, **Fig. 2S** shows a typical TEM overview of the bare TiO<sub>2</sub> NRs and of the metal-TiO<sub>2</sub> nanorod composite photocatalysts used for the experiments reported in Fig. 1-3 in the manuscript.

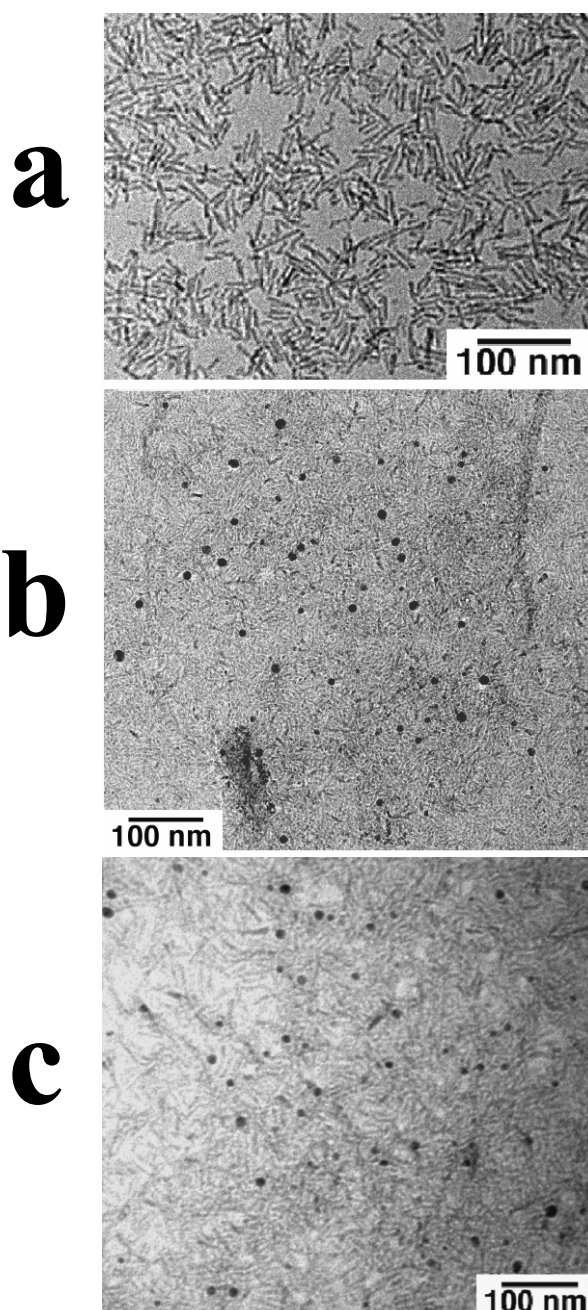

**Figure 2S:** Representative low resolution TEM images of the TiO<sub>2</sub> nanorods (a), and of the TiO<sub>2</sub> NR-stabilized Ag (b) and Au nanoparticles (c) employed for the present study. Note that in (a) the titania NRs appear well separated on the carbon grid due to the very low NR concentration in the solution used for TEM analysis. As opposed, in (b-c) the NRs can not be individually discerned as they form a compact layer because higher particle concentration had to be generally used in order to

show an extensive grid coverage by the metal NPs. Thus, in (b-c), the significantly different image contrast characterizing TiO<sub>2</sub> when compared to the metal makes the Au and Ag nanoparticles easily identifiable as dark spots superimposed on an underlying titania background, as confirmed by energy dispersive analysis of X-rays (EDAX). Electron diffraction pattern analysis also reveals that the samples contain both the metallic particles and anatase titania.

## 2. Photoinduced charge storage experiments.

The TiO<sub>2</sub>/metal nanocomposite solutions were always freshly prepared. The composite photocatalyst was co-precipitated from the original growth solution upon addition of excess methanol (10 times the volume of the starting solution), then it was washed twice with methanol before being re-dissolved completely in anhydrous CHCl<sub>3</sub> under the inert atmosphere of a glove-box. Such a procedure served to eliminate unreacted metal precursor ions, that could be further reduced in the subsequent irradiation step.

A quartz cuvette was filled with a solution containing the desired amount of the purified TiO<sub>2</sub>/metal stock solution in CHCl<sub>3</sub> and diluted with a concentrated TiO<sub>2</sub> nanorod solution in deaerated CHCl<sub>3</sub>:EtOH mixture. The final solvent composition was typically CHCl<sub>3</sub>:EtOH=60:40 v/v. The concentration of the nanocrystal species is always expressed with reference to the parent species, TTIP and either HAuCl<sub>4</sub> or AgNO<sub>3</sub> in a CHCl<sub>3</sub>:EtOH=90:10 v/v mixture. The metal precursor concentration ranged between 10<sup>-5</sup> M and 10<sup>-4</sup> M, while TiO<sub>2</sub> concentration was between 10<sup>-3</sup> M and 10<sup>-1</sup> M.

The cuvette was sealed by a Teflon-faced rubber cap and brought out of the glove box to be illuminated with a 254 nm He:Hg lamp (400 μW/cm<sup>2</sup>) for 30 min. The choice of this low-power monochromatic irradiation source ensured that the initial metal nanoparticle size, size-distribution were kept unchanged throughout the illumination period necessary to observe e<sub>CB</sub> accumulation. It is, in fact, known that Ag NPs can photofragment and/or photofuse, while Au NPs can aggregate significantly upon illumination with much more intense and polychromatic UV sources (e.g. by a high Pressure 200 W mercury lamp, λ > 300 nm, as described in ref. 15, 17-18). The metal nanoparticle size, size-distribution were confirmed by TEM analysis.

The charging-discharging cycle could be repeated several times (up to about 30-40 times) with high reproducibility before observing incipient photocatalyst precipitation (likely due to photodegradation of the TiO<sub>2</sub> organic capping layer)

## 3. Titration of the trapped CB electrons

To titrate CB electrons stored on the photocatalysts, a concentrated UBA solution in  $\text{CHCl}_3:\text{EtOH}=60:40$  v/v was prepared in the glove box and then syringed through the septum of the cuvette under strict exclusion of air. In **Table 1S** the results of several experiments are reported which show that the degree of  $e_{\text{CB}}$  accumulation increased with increasing the metal NP concentration and/or decreasing the mean metal NP size. Such an effect appearing more pronounced for  $\text{TiO}_2$  coupled with Au than with Ag at constant metal concentration. Notably, at metal concentration significantly higher than  $1 \times 10^{-5}$  M, the amount of stored  $e_{\text{CB}}$  did not increase appreciably.

| [metal]                    | <b>TiO<sub>2</sub>/Ag</b> |          |          | <b>TiO<sub>2</sub>/Au</b> |          |          |
|----------------------------|---------------------------|----------|----------|---------------------------|----------|----------|
|                            | Ag particle size          |          |          | Au particle size          |          |          |
|                            | 10 ± 2nm                  | 15 ± 3nm | 25 ± 5nm | 10 ± 2nm                  | 15 ± 3nm | 25 ± 5nm |
| <b>5*10<sup>-7</sup> M</b> | 71                        | 60       | 45       | 102                       | 84       | 59       |
| <b>8*10<sup>-7</sup> M</b> | 85                        | 68       | 57       | 118                       | 99       | 84       |
| <b>2*10<sup>-6</sup> M</b> | 98                        | 77       | 62       | 133                       | 114      | 92       |
| <b>1*10<sup>-5</sup> M</b> | 115                       | 105      | 88       | 145                       | 135      | 105      |

**Table 1S** In the table, the values of UBA concentration ( $\mu\text{M}$ , with accuracy of  $\pm 2 \mu\text{M}$ ) required to titrate  $e_{\text{CB}}$  electrons stored in  $\text{TiO}_2$  nanorod-metal composite solutions are reported as a function of the total metal concentration and/or of the metal mean particle size (constant conditions:  $[\text{TiO}_2]=0.1$  M, irradiation time = 30 min). To titrate the sole  $\text{TiO}_2$ , about  $50 \mu\text{M}$  UBA was required. The corresponding concentration of trapped CB electrons can be calculated as:  $[e_{\text{CB}}] = n * [\text{UBA}]$ , where  $n = 2$  is the number of electrons involved in the reduction of one dye molecule.

In a first approximation, the conversion efficiency,  $\Phi$ , of the excitation process, i.e. the number of generated electrons trapped in the  $\text{TiO}_2$  conduction band ( $e_{\text{CB}}$ ) per photon of UV incident radiation can be expressed as:

$$\Phi = [e_{\text{CB}}]/D_{\text{ph}} \quad (\text{with } D_{\text{ph}} = \text{density of emitted photons})$$

For a strictly monochromatic source at  $\lambda = 254$  nm, the energy carried by one photon will be about  $7.818 \times 10^{-19}$  J. As the light power incident to the cuvette wall is  $400 \mu\text{W}/\text{cm}^2$ , the photon intensity

will be about  $I_{ph} = 51 \cdot 10^{13} \text{ sec}^{-1} \text{ cm}^{-3}$ , in the approximation of an isotropic point source.  $I_{ph}$  can be converted into  $I_{ph}'$ , the number of incident photons per second and per liter:

$$I_{ph}' = 51 \cdot 10^{13} \text{ sec}^{-1} \text{ cm}^{-3} \cdot 1000 \text{ cm}^3/\text{L} = 51 \cdot 10^{16} \text{ sec}^{-1} \text{ L}^{-1}$$

From the data of the experiments in Fig. 3 for the various photocatalyst systems (see also table 1),  $\Phi$  can be calculated as:

$$\Phi = [e_{CB}] / D_{ph} = 2 \cdot [UBA] / (I_{ph}' \cdot \Delta t / N_A)$$

where  $\Delta t$  is the irradiation time and  $N_A$  is the Avogadro number. For example, in the case of irradiation of  $\text{TiO}_2$  0.1 M with metal particle size of  $15 \pm 3 \text{ nm}$  carried out at  $[\text{metal}] = 5 \cdot 10^{-7} \text{ M}$  for  $\Delta t = 30 \text{ min}$ , it can be calculated:

$$\Phi_{\text{TiO}_2} = 0.033$$

$$\Phi_{\text{Ag-TiO}_2} = 0.039$$

$$\Phi_{\text{Au-TiO}_2} = 0.055$$

By increasing the metal concentration to  $1 \cdot 10^{-5} \text{ M}$  (see table 1), the conversion efficiency becomes:

$$\Phi_{\text{Ag-TiO}_2} = 0.069$$

$$\Phi_{\text{Au-TiO}_2} = 0.088$$

### 3. Characterization techniques

*UV-vis Absorption spectroscopy.* UV-vis absorption spectra were recorded with Cary 5 Varian UV-vis near-IR spectrophotometer.

*Transmission Electron Microscopy.* Transmission electron microscopy (TEM) images were obtained using Philips EM 430 microscope (TEM) operating at 300 kV. The samples for the analysis were prepared by dropping dilute solutions of  $\text{TiO}_2/\text{metal}$  nanocomposite onto 400-mesh carbon-coated copper grids and leaving the solvent to dry. The samples were stable under the electron beam and did not degrade within the typical observation times.
